# Supplementary material for: Effects of arachidonic acid supplementation in maturation diet on female reproductive performance and larval quality of giant river prawn (Macrobrachium rosenbergii)
Source: PeerJ. 2016 Nov 29;4:e2735. doi: 10.7717/peerj.2735 (PMC5131618; doi:10.7717/peerj.2735)
Supplement: Data S2 [file peerj-04-2735-s002.xlsx]

## Sheet: raw data ov2
raw data % of fatty acid in ovary2
treatment	c14	c15	c16	c16:1	c17	c17:1	c18	c18:1n9	c18:2n6	c18:3n3	c20	c20:4n6	c20:5n3	c22:6n3
A0	1.82	0.6	12.69	1.25	5.18	0.52	6.41	18.78	16.26	0.67	0.99	2.32	2.34	5.25
A0	1.78	0.55	13.65	1.1	5.6	0.54	6.56	18.91	17.39	0.53	0.98	2.33	2.34	5.25
A0	1.63	0.57	13.78	1.37	5.21	0.57	6.43	18.87	17.63	0.49	0.78	2.41	2.51	5.28
A1	2.12	0.97	18.3	2.96	1.03	0.47	7.2	18.74	15.41	1.03	0.52	4.12	2.28	5.3
A1	2.1	1.07	19.01	3.12	1.19	0.49	7.66	17.65	15.49	1.15	0.59	4.18	2.3	4.86
A1	1.99	1.09	19.58	3.19	1.21	0.51	7.4	17.67	16.16	1.2	0.57	4.06	2.44	5.1
A2	1.8	0.91	19.12	3.61	0.77	0.39	7.6	22.36	18.92	0.91	0.88	4.32	2.21	5.13
A2	1.72	0.97	20.57	3.32	1.12	0.49	7.93	23.26	18.56	1.1	0.85	4.53	2.38	5.05
A2	1.63	0.89	18.79	3.2	1.03	0.46	7.34	20.82	17.16	1.02	0.79	4.41	2.36	5.11
B0	1.76	1.2	21.19	3.51	1.21	0.5	7.96	20.93	20.21	1.35	0.64	2.95	2.28	4.53
B0	1.77	1.13	21.19	3.69	1.25	0.52	7.97	20.57	20.26	1.37	0.63	3.21	2.38	4.63
B0	1.75	1.14	21.22	3.43	1.23	0.52	7.84	20.63	20.29	1.38	0.64	3.3	2.39	4.66
B1	1.98	1.15	20.42	3.71	1.63	0.48	8.74	21.63	18.41	1.13	0.75	4.86	1.97	3.98
B1	1.97	1.11	20.41	3.58	1.48	0.49	7.98	20.81	19.21	1.2	0.73	4.56	1.97	4.15
B1	1.91	1.12	21.05	3.28	1.51	0.52	8.31	19.91	19.56	1.31	0.72	3.99	2.26	4.26
B2	3.43	1.06	19.48	3.08	1.38	0.48	7.97	18.19	17.92	1.13	0.66	5.68	1.67	4.18
B2	3.08	1.07	19.04	3.12	1.39	0.53	9.24	19.91	17.83	1.09	0.59	5.95	1.69	4.56
B2	3.49	1.18	20.54	3.21	1.33	0.5	8.95	19.33	18.26	1.26	0.7	5.31	1.71	4.25

## Sheet: raw data ov3
raw data % of fatty acid in ovary3
treatment	c14	c15	c16	c16:1	c17	c17:1	c18	c18:1n9	c18:2n6	c18:3n3	c20	c20:4n6	c20:5n3	c22:6n3
A0	2.6	0.77	15.69	4.23	0.99	0.64	7.7	21.9	19.07	1.57	0.39	2.87	3.87	7.1
A0	2.48	0.78	15.22	4.2	1.16	0.67	7.74	21.82	18.97	1.66	0.33	2.98	4.91	7
A0	2.36	0.78	14.98	4.25	1.13	0.65	7.69	21.8	18.93	1.45	0.34	2.94	4.91	6.98
A1	3.19	1.01	21.49	3.78	1.34	0.72	7.03	22.32	17.69	1.31	0.46	4.25	4.43	6.25
A1	3.35	0.96	21.51	3.7	1.23	0.7	7	22.34	17.65	1.32	0.45	4.58	4.56	6.14
A1	3.1	0.98	21.53	3.85	1.21	0.69	7.03	22.37	17.42	1.38	0.43	4.73	4.69	6.12
A2	3.17	0.9	21.49	3.58	1.25	0.65	7.28	22.28	18.96	1.53	0.49	5.01	5.16	6.23
A2	3.01	0.89	21.53	3.49	1.29	0.68	7.35	22.24	19.54	1.54	0.46	5.01	5.46	6.32
A2	3.91	0.86	21.23	3.41	1.24	0.67	7.29	22.32	18.89	1.52	0.41	5.07	5.18	6.27
B0	3.7	0.79	21.11	4.2	1.16	0.71	7.3	24.72	19.96	1.59	0.51	2.65	4.58	6.17
B0	3.72	0.73	21.04	4.22	1.14	0.7	7.21	24.78	20	1.56	0.53	2.69	4.56	6.64
B0	3.73	0.75	21.03	4.12	1.11	0.79	7.12	24.38	19.87	1.55	0.55	3.17	4.53	6.78
B1	4.58	0.95	20.89	3.76	1.22	0.68	7.2	21.97	19.36	1.3	0.39	5.8	4.88	5.42
B1	4.17	0.93	20.85	3.68	1.29	0.65	7.35	22.23	19.7	1.32	0.36	6.02	4.87	5.5
B1	3.92	0.92	20.98	3.61	1.28	0.64	7.12	22.24	19.6	1.38	0.41	5.8	4.23	5.36
B2	3.19	1.12	21.15	3.34	1.37	0.51	8.16	19.97	18.9	1.26	0.44	6.29	3.76	4.01
B2	3.31	1.18	21.21	3.32	1.32	0.49	8.01	19.68	19	1.24	0.45	6.01	3.56	3.98
B2	3.33	1.13	21.01	3.41	1.31	0.5	8	19.1	19.8	1.28	0.4	6.17	3.29	4.19

## Sheet: raw data ov4
raw data % of fatty acid in ovary4
treatment	c14	c15	c16	c16:1	c17	c17:1	c18	c18:1n9	c18:2n6	c18:3n3	c20	c20:4n6	c20:5n3	c22:6n3
A0	1.12	3.44	20.47	3	0.99	0.74	7	23.98	19.97	1.5	0.57	2.98	3.12	6.19
A0	1.15	3.5	20.43	2.82	0.95	0.75	6.96	24.23	20.12	1.48	0.59	3.01	3.47	6.28
A0	1.19	3.15	20.42	2.74	0.98	0.76	6.99	24.48	20.24	1.49	0.6	3.07	3.32	6.56
A1	1.63	0.83	20.58	3.33	1.29	0.59	6.56	21.62	19.91	1.25	0.45	4.98	4.82	6.12
A1	1.65	0.9	20.62	3.21	1.32	0.63	6.32	21.32	19.89	1.22	0.48	5.12	4.43	6
A1	1.7	0.79	20.36	3.89	1.4	0.66	6.51	21.24	19.83	1.28	0.46	5.21	4.57	6.05
A2	1.6	0.75	20.53	3.65	1.32	0.65	6.22	22.84	18.78	1.39	0.6	6.16	4.61	6.1
A2	1.55	0.72	20.43	3.5	1.3	0.63	6.65	22.73	18.54	1.38	0.54	5.46	4.63	6.12
A2	1.54	0.7	20.23	3.49	1.34	0.6	6.7	22.71	18.61	1.39	0.55	5.39	4.56	6.2
B0	1.35	0.79	20.03	3.87	1.08	0.64	5.93	24.87	21.08	1.75	0.48	2.58	4.98	6.04
B0	1.3	0.75	20.08	3.87	1.05	0.64	5.98	25.01	20.78	1.72	0.46	2.62	4.95	6.48
B0	1.36	0.78	20.03	3.78	1.02	0.7	5.68	24.7	20.94	1.7	0.47	2.18	4.78	6.04
B1	1.5	0.8	20.23	3.71	1.05	0.61	6.54	21.87	18.85	1.45	0.49	5.96	5.04	5.88
B1	1.45	0.82	20.15	3.56	1.08	0.62	6.74	21.72	19.88	1.42	0.52	6	5.02	6.18
B1	1.46	0.81	20.27	3.66	1.1	0.68	6.54	21.53	19.62	1.5	0.51	6.54	5	6.11
B2	1.71	0.85	19.64	3.21	1.17	0.61	6.31	23.56	20.84	1.53	0.64	7	5.1	6.14
B2	1.7	0.82	19.9	3.18	1.2	0.62	6.4	23.49	21.03	1.51	0.61	7.15	5.09	6.15
B2	1.8	0.86	19.68	3.19	1.16	0.61	6.51	23.29	21.21	1.57	0.6	7.1	5.12	5.96

## Sheet: raw data ov5
raw data % of fatty acid in ovary5
treatment	c14	c15	c16	c16:1	c17	c17:1	c18	c18:1n9	c18:2n6	c18:3n3	c20	c20:4n6	c20:5n3	c22:6n3
A0	1.79	0.92	21.14	4.12	1.25	0.68	4.76	15.7	17.1	1.2	0.36	2.31	5.23	6.99
A0	1.81	0.89	20.9	4.2	1.23	0.65	4.89	15.88	17.62	1.16	0.29	2.1	5.28	6.93
A0	1.82	0.9	21.1	3.98	1.24	0.7	5.06	15.89	17.5	1.12	0.34	2.01	5.24	6.95
A1	1.44	0.76	20.82	3.32	1.16	0.7	7.63	22.85	17.14	1.42	0.35	4	5.01	6.1
A1	1.41	0.73	19.97	3.3	1.15	0.65	7.12	22.7	17.21	1.43	0.32	4.1	4.81	6.21
A1	1.43	0.71	19.82	3.22	1.09	0.64	7.58	22.96	17.1	1.39	0.32	3.95	4.78	5.96
A2	1.23	0.69	18.97	3.35	1.13	0.59	7.25	22.68	16.2	1.42	0.32	5.52	4.08	4.43
A2	1.3	0.68	19.27	3.24	1.11	0.58	7.23	22.12	17.56	1.56	0.35	5.65	4.15	4.51
A2	1.33	0.6	19.14	3.37	1.1	0.52	7.12	22.44	17	1.45	0.32	5	4.18	4.7
B0	1.44	0.85	21.2	4.15	1.09	0.72	6.44	21.95	18.02	1.62	0.28	2.01	4.58	6.44
B0	1.5	0.8	21.1	4.12	1.1	0.71	6.43	22.2	18.14	1.6	0.25	1.99	4.57	6.39
B0	1.47	0.81	21.2	4.21	1.06	0.73	6.35	21.78	17.98	1.69	0.29	1.98	4.53	6.36
B1	1.7	0.81	20.78	3.59	1.18	0.6	7.19	22.44	18.97	1.3	0.5	4.98	5.37	6.71
B1	1.72	0.87	20.87	3.53	1.2	0.61	7.24	22.56	19.1	1.35	0.48	5.01	5.54	6.8
B1	1.7	0.8	20.76	3.54	1.15	0.63	7.31	22.32	19.76	1.35	0.49	4.98	5.69	6.59
B2	1.51	0.74	20.45	3.98	1.01	0.59	7.79	21.89	19.39	1.39	0.58	4.45	4.41	6.02
B2	1.48	0.7	20.35	4.1	0.98	0.58	7.83	22.2	19.59	1.37	0.6	4.58	4.45	5.99
B2	1.5	0.75	20.41	4.21	1.04	0.6	7.7	21.78	19.3	1.38	0.59	4.64	4.37	6.01

## Sheet: raw data orange egg
raw data % of fatty acid in orange egg
treatment	c14	c15	c16	c16:1	c17	c17:1	c18	c18:1n9	c18:2n6	c18:3n3	c20	c20:4n6	c20:5n3	c22:6n3
A0	2.6	0.43	20.61	4.38	1.51	0.51	6.63	21.86	18.36	0.59	0.84	3.81	8.4	5.43
A0	2.64	0.5	20.47	4.4	1.55	0.58	6.59	21.72	18.22	0.64	0.97	3.73	8.18	5.35
A0	2.63	0.39	20.32	4.44	1.53	0.61	6.39	21.52	18.02	0.65	0.53	3.91	8.35	5.21
A1	2.52606	0.512196	20.59	4.52	1.69	0.64	6.83	21.83	18.23	0.38	0.52	4.5	8.57	5.55
A1	2.63	0.48	21.75	4.42	1.68	0.57	6.79	21.69	17.98	0.33	0.51	4.65	8.58	5.48
A1	2.4	0.52	20.56	4.43	1.47	0.85	6.61	21.57	17.85	0.36	0.49	4.79	8.61	5.45
A2	2.54	0.44	21.79	4.34	1.28	0.75	6.63	22.21	17.86	0.65	0.74	5.47	8.11	5.25
A2	2.57	0.49	21.62	4.42	1.29	0.78	6.36	22.27	17.68	0.64	0.49	5.58	8.04	5.37
A2	2.56	0.5	20.95	4.38	1.37	0.71	6.8	22.08	17.69	0.65	0.5	5.39	8.03	5.34
B0	2.51	0.46	19.62	4.52	1.28	0.67	6.85	22.28	18.04	0.7	0.32	2.62	8.23	3.39
B0	2.64	0.42	20.85	4.43	1.26	0.62	6.49	22.23	17.94	0.61	0.21	2.74	8.22	3.34
B0	2.54	0.32	20.74	4.49	1.2	0.69	6.63	21.93	18.24	0.67	0.32	2.64	8.2	3.44
B1	1.64	0.74	20.85	5.14	1.02	0.83	6.5	23.55	16.43	1.13	0.27	5.87	4.72	5.95
B1	1.68	0.74	20.83	5.16	1.06	0.89	6.58	23.56	16.62	1.18	0.37	5.59	4.01	6.27
B1	1.68	0.66	20.91	5.26	1.03	0.99	7.29	23.44	16.64	1.15	0.35	5.85	3.71	6.16
B2	1.69	0.71	21.97	5.44	1.04	1.04	6.79	24.25	16.31	1.12	0.36	5.85	4.16	6.45
B2	1.66	0.69	21.48	5.38	0.99	1.01	6.74	24.21	16.24	1.14	0.34	5.94	4	6.29
B2	1.7	0.7	21.52	5.46	0.99	0.96	6.8	24.66	16.36	1.16	0.35	5.88	4.04	6.25

## Sheet: raw data brawn egg
raw data % of fatty acid in brown egg
treatment	c14	c15	c16	c16:1	c17	c17:1	c18	c18:1n9	c18:2n6	c18:3n3	c20	c20:4n6	c20:5n3	c22:6n3
A0	2.03	0.85	22.99	4.05	1.03	0.71	6.75	23.96	19.02	1.31	0.88	3.51	4.52	5.7
A0	2.06	0.94	22.3	4.39	1.05	0.68	6.9	23.91	18.88	1.28	0.79	3.44	4.55	5.62
A0	1.99	0.89	22.12	3.94	1.11	0.68	7.01	24.03	19.15	1.3	0.72	3.59	4.69	5.84
A1	1.94	0.82	22.21	3.92	1.24	0.74	7.94	23.56	17.98	1.17	0.53	4.56	5.06	5.85
A1	1.96	0.78	21.69	3.97	1.23	0.77	7.97	23.75	17.83	1.28	0.52	4.92	4.93	6.6
A1	1.91	0.85	22.4	3.89	1.29	0.75	8.03	23.47	18.33	1.25	0.41	4.68	4.99	6.01
A2	1.87	0.76	21.32	3.93	1.18	0.65	8.53	24.39	18.26	1.17	0.42	5.39	4.51	5.42
A2	1.81	0.68	22.23	4.11	1.2	0.7	8.55	24.48	18.52	1.14	0.45	5.33	4.65	5.02
A2	1.85	0.78	22.62	3.85	1.19	0.71	8.62	24.65	18.79	1.11	0.47	5.36	4.66	5.23
B0	1.69	0.49	20.05	4.15	1.22	0.7	7.38	23.61	19.03	0.9	0.43	1.32	3.66	4.25
B0	1.68	0.48	20.04	4.36	1.21	0.72	7.29	23.54	18.96	0.89	0.52	1.43	3.22	4.58
B0	1.61	0.45	20.07	3.98	1.26	0.69	7.36	23.65	18.78	0.94	0.43	1.65	3.56	4.44
B1	1.75	0.64	21.07	4.12	0.94	0.68	8.59	21.81	18.95	0.97	0.31	4.68	3.96	4.86
B1	1.71	0.63	21.65	4.11	0.99	0.64	8.56	21.83	19.01	0.94	0.32	4.7	3.87	4.98
B1	1.89	0.68	21.35	4.01	1.01	0.62	8.98	20.98	19.12	0.98	0.38	4.78	3.88	4.89
B2	1.98	0.67	22.63	4.26	0.84	0.59	9.02	21.48	19.56	1.02	0.35	5.61	3.56	4.42
B2	1.82	0.63	22.01	4.27	0.85	0.65	8.94	21.45	19.96	1.05	0.37	5.68	3.96	4.48
B2	1.88	0.62	22.14	4.23	0.88	0.6	8.92	21.43	20.01	1.06	0.39	6.01	3.94	4.46

## Sheet: raw data larvae
raw data % of fatty acid in larvae
treatment	c14	c15	c16	c16:1	c17	c17:1	c18	c18:1n9	c18:2n6	c18:3n3	c20	c20:4n6	c20:5n3	c22:6n3
A0	2.22	1.02	23.86	3.78	1.33	0.74	8.51	21.05	16.76	1.08	0.56	2.23	5.89	5.1
A0	2.11	1.03	23.56	3.68	1.36	0.68	8.86	21.09	16.65	1.09	0.54	2.31	5.63	4.93
A0	2.16	0.98	23.66	3.65	1.35	0.69	8.68	20.88	16.69	1.07	0.56	2.24	5.73	5.12
A1	1.87	0.81	21.23	3.21	1.15	0.6	8.85	19.35	15.89	0.96	0.54	4.23	6.01	4.53
A1	1.85	0.85	21.12	3.33	1.14	0.54	8.65	19.24	15.78	0.89	0.51	4.12	5.68	4.35
A1	1.82	0.81	21.43	3.2	1.18	0.56	8.58	19.23	15.88	0.86	0.53	4.02	5.88	4.82
A2	2.15	0.91	22.81	3.42	1.45	0.6	9.7	20.17	16.82	0.96	0.61	5.42	5.86	4.47
A2	2.27	0.9	22.76	3.41	1.42	0.56	9.53	19.75	15.96	0.95	0.66	5.32	5.32	4.42
A2	2.14	0.97	21.92	3.43	1.47	0.57	9.83	19.85	15.86	0.9	0.74	5.41	5.69	4.39
B0	2.15	1.12	23.6	3.27	1.47	1.07	9.25	19.26	16.56	0.92	0.7	3.01	7.87	4.32
B0	2.13	1.16	23.32	3.25	1.5	1.14	9.24	19.04	17.77	1.03	0.69	2.65	6.78	4.37
B0	2.15	1.15	23.48	3.24	1.49	1.05	9.35	18.6	16.66	1.09	0.7	2.56	6.53	4.23
B1	2.21	0.92	24.64	3.11	1.63	0.66	9.48	20.12	16.78	1.04	0.62	5.24	5.96	5.21
B1	2.2	0.98	24.79	3.14	1.65	0.69	9.57	19.98	15.77	0.95	0.66	5.42	6.55	5.02
B1	2.1	1.07	24.78	3.17	1.61	0.68	9.69	20.23	16.59	1	0.64	5.36	6.43	5.49
B2	2.24	1.02	24.39	3.31	1.52	0.63	9.52	20.65	17.96	1.03	0.6	6.65	5.81	5.18
B2	2.27	1.06	24.18	3.28	1.61	0.64	9.64	20.84	18.23	1.07	0.59	6.35	5.89	5
B2	2.27	1.09	24.32	3.35	1.56	0.61	9.62	20.38	17.84	1.07	0.61	6.55	5.85	4.96

## Sheet: raw data diet
raw data % of total fatty acid in diet
treatment	c14	c15	c16	c16:1	c17	c17:1	c18	c18:1n9	c18:2n-6	c18:3n3	c20:4n6	c20:5n3	c22:6n3
A0	2.78493	3.59023	20.4981	4.60218	2.47199	5.35484	6.99491	13.4046	16.447	5.70927	2.82604	4.71467	10.6013
A0	2.25183	3.54081	22.2205	4.04364	3.43688	3.09468	6.39946	12.9472	16.9255	7.84845	2.73726	4.38192	10.1718
A0	2.52338	3.35997	20.0029	4.22575	2.43817	5.77416	6.86617	13.3573	18.3035	5.23606	2.74951	4.52387	10.6393
A1	3.64286	5.09642	15.8861	3.78801	3.75028	6.55993	6.05067	10.3004	15.8474	8.71658	5.88686	4.90029	9.57415
A1	2.31485	4.23777	18.4717	4.13585	3.16576	5.3442	6.67258	12.5814	13.5916	7.61138	6.19902	5.20307	10.4708
A1	2.35493	3.60504	19.7658	4.2523	1.85618	4.51935	6.53047	13.8396	15.1182	6.6452	6.40982	5.16045	9.94269
A2	2.23494	4.06868	17.1621	3.56951	2.90591	5.1652	5.64566	15.1026	12.4966	7.72975	9.10805	5.61589	9.19508
A2	2.85561	3.89251	18.1517	3.71236	2.74943	4.84549	5.88416	15.7798	13.6785	6.15132	9.53368	5.66551	9.09989
A2	2.50527	3.2921	16.3341	3.56918	2.57216	4.18801	5.77853	17.1674	13.8817	6.44583	9.64297	5.46086	9.16186
B0	2.39217	3.00013	18.5965	4.13366	2.78104	4.08208	5.60535	17.164	21.6494	7.17137	2.99133	4.74839	5.68457
B0	2.22921	3.79679	17.2002	4.08322	2.9566	4.64497	5.55682	16.3633	18.7895	8.1249	3.10979	4.77446	8.37023
B0	2.14083	3.79713	16.5069	3.93656	2.88591	4.99869	5.31308	15.502	20.7231	8.17102	3.14862	4.68769	8.18844
B1	2.75792	3.6606	15.5533	4.73874	3.71866	3.73178	3.93597	17.2699	21.3376	7.30831	5.60031	4.56251	5.82441
B1	2.23945	2.9976	17.8522	4.78544	2.59698	3.91315	4.36504	16.0166	22.0173	6.56617	5.81049	4.41627	6.42339
B1	2.16441	3.37567	17.2682	4.78907	3.39532	4.27002	4.1567	15.5565	21.9913	6.79415	5.79961	4.31114	6.12792
B2	2.26138	3.1588	16.5685	3.6204	1.71489	3.95042	4.23544	15.1459	22.7827	7.12468	8.35707	4.03155	7.04832
B2	1.97846	3.52912	16.2847	3.47878	1.77545	4.21872	4.3886	15.7237	22.8306	7.47933	8.2918	3.975	6.04567
B2	2.11645	3.30305	16.915	3.53486	1.76181	3.92015	4.40853	15.1274	21.8453	7.32831	8.34851	4.16168	7.2289

## Sheet: raw data muscle
raw data % of total fatty acid in muscle
treatment	c14	c15	c16	c16:1	c17	c17:1	c18	c18:1n9	c18:2n-6	c18:3n3	c20:4n6	c20:5n3	c22:6n3
A0	2.69	3.37	24.01	2.24	1.87	3.21	9.1	14.08	15.63	2.74	6.25	10.14	4.67
A0	2.22	3.1	20.75	2.11	1.65	3.83	7.63	13.88	13.45	6	4.92	16.17	4.29
A0	2.56	3.41	22.05	2.3	1.82	2.01	8.47	13.24	13.59	6.16	5.21	14.59	4.61
A1	2	2.72	20.3	1.9	1.75	3.27	9.38	13.22	15.11	5.08	8.85	11.36	5.06
A1	2.54	3.37	22.75	4.82	2.61	4.36	8.88	11.81	13.08	2.65	7.15	11.06	4.92
A1	2.38	3.1	22.87	2.01	2.06	3.73	8.79	11.37	14.95	5.75	7.93	10.44	4.64
A2	1.79	2.54	22.52	1.68	1.73	3.37	9.6	12.7	15.86	2.68	11.29	9.86	4.38
A2	2.28	3	22.53	4.25	2.24	3.7	8.6	11.12	16.76	2.59	9.99	8.08	4.87
A2	2.03	2.71	22.56	1.76	2.07	3.54	8.55	11.87	16.82	5.34	9.66	8.14	4.96
B0	2.31	3.07	23.79	4.33	2.31	3.84	8.13	11.64	19.41	2.84	5	9.31	4.03
B0	2.46	3.15	23.65	1.89	2.4	3.91	7.75	11.25	18.38	6.29	5.03	9.89	3.95
B0	2.68	3.52	23.58	2.07	2.62	4.17	8.11	12.01	18.09	3.12	6.15	9.71	4.16
B1	2.4	3.33	21.16	1.95	2.52	3.07	8.64	10.53	19.64	6.48	7.96	8.7	3.62
B1	2.98	3.94	22.96	2.02	2.17	4.68	8.27	10.8	18.05	3.26	7.97	9.42	3.5
B1	2.86	3.92	21.72	1.89	1.87	4.64	7.85	10.19	18.08	7.09	7.3	9.04	3.54
B2	3.06	3.99	21.89	2.24	1.82	3.56	7.98	8.38	20.26	5.94	8.76	8.83	3.3
B2	2.56	3.27	23.13	2.01	2.49	4.05	8.57	12.23	17.84	3.03	8.71	8.67	3.43
B2	2.37	3.18	22.37	4.45	2.44	3.8	7.93	10.65	18.44	5.92	7.84	7.74	2.86
